# Supplementary material for: Association of Stress With Cognitive Function Among Older Black and White US Adults
Source: PubMed Central journal article supplement (PMC9993177; doi:10.1001/jamanetworkopen.2023.1860), 2023-03-07
Supplement: jamanetwopen-e231860-s001.pdf [file jamanetwopen-e231860-s001.pdf]

## Data Sharing Statement

Kulshreshtha. Association of Stress With Cognitive Function Among Older Black and White US Adults. *JAMA Netw Open*. Published March 07, 2023.

doi:10.1001/jamanetworkopen.2023.1860

### Data

**Data available:** Yes

**Data types:** Deidentified participant data

**How to access data:** REGARDS Study website: <https://www.uab.edu/soph/regardsstudy/>

**When available:** With publication

### Supporting Documents

**Document types:** Other (please specify)

**Additional Information:** Please email the study lead author for statistical code

**How to access documents:** Please email the study lead author for statistical code

**When available:** With publication

### Additional Information

**Who can access the data:** Researchers whose proposed use of the data has been approved.

**Types of analyses:** For a specified purpose approved by the investigators of REGARDS cohort study

**Mechanisms of data availability:** Approval of a proposal by the investigators of REGARDS cohort study

**Any additional restrictions:** <https://www.uab.edu/soph/regardsstudy/>
